# Supplementary material
Source: PubMed Central journal article supplement (PMC3412957)

Figure S1

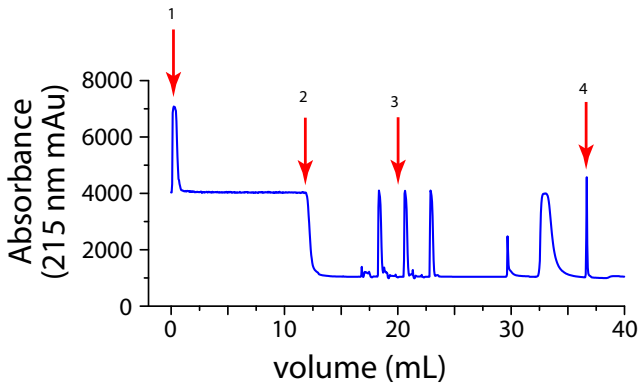

Supplement: supp_O112.018366_mcp.O112.018366-2.pdf [file supp_O112.018366_mcp.O112.018366-2.pdf]

# Supplementary Figure S2

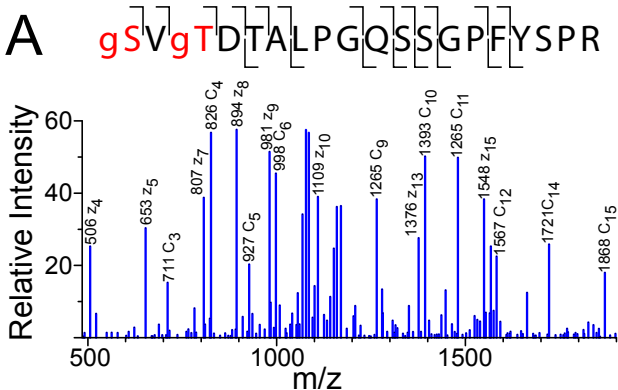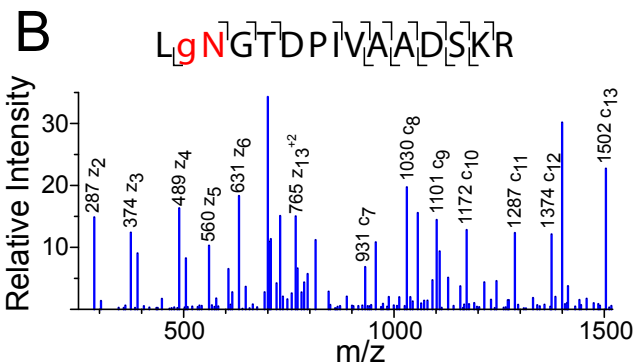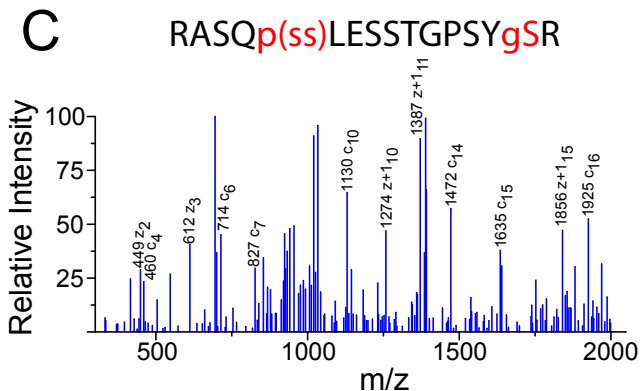

Supplement: supp_O112.018366_mcp.O112.018366-3.pdf [file supp_O112.018366_mcp.O112.018366-3.pdf]

Figure S3

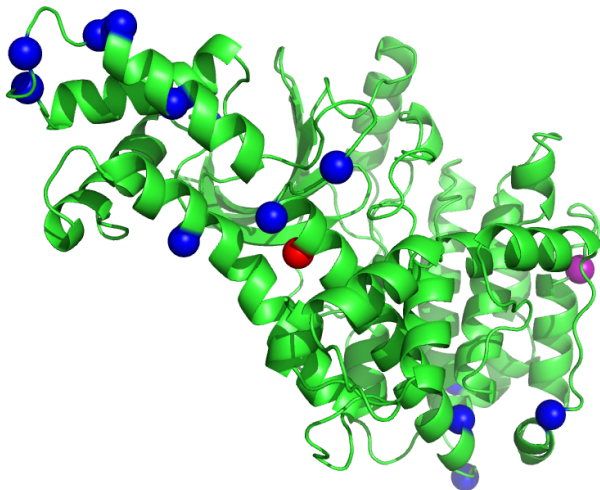

Supplement: supp_O112.018366_mcp.O112.018366-4.pdf [file supp_O112.018366_mcp.O112.018366-4.pdf]
